# Supplementary material
Source: PubMed Central journal article supplement (PMC8561746)
Supplement: NIHMS1694186-supplement-3.pdf [file NIHMS1694186-supplement-3.pdf]

## Supplementary Figure S1

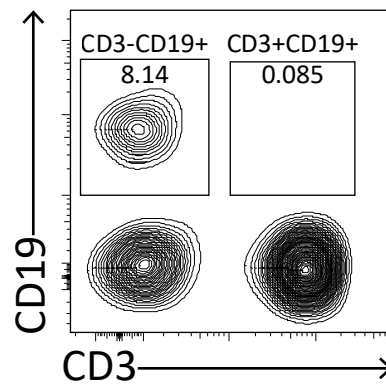

**Supplementary Figure S1. Percent CAR T cells in the blood of the patient during therapy (Post-CAR).** Flow cytometry shows CD3+CD19+ as a marker of CAR T cells in patient blood during therapy.

## Supplementary Figure S2

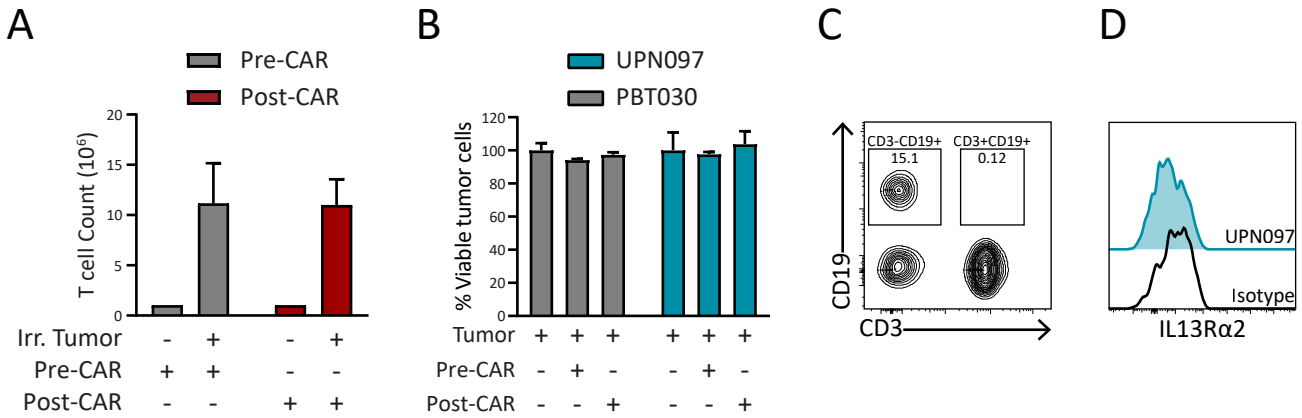

**Supplementary Figure S2. Tumor reactivity of endogenous T cell in a non-responder patient. A,** T cell count after 14-day co-culture with autologous irradiated (Irr.) patient tumor cell line (UPN097). **B,** In vitro coculture of patient T cells against autologous (UPN097) or nonspecific tumor line (PBT030) at 1:1, E:T ratio. **C,** Flow cytometry shows CD3+CD19+ as a marker of CAR T in patient blood during therapy. **D,** Representative flow cytometry demonstrates IL13R $\alpha$ 2 expression of the patient autologous (UPN097) tumor line. Data are presented as means  $\pm$  s.e.m.

# Supplementary Figure S3

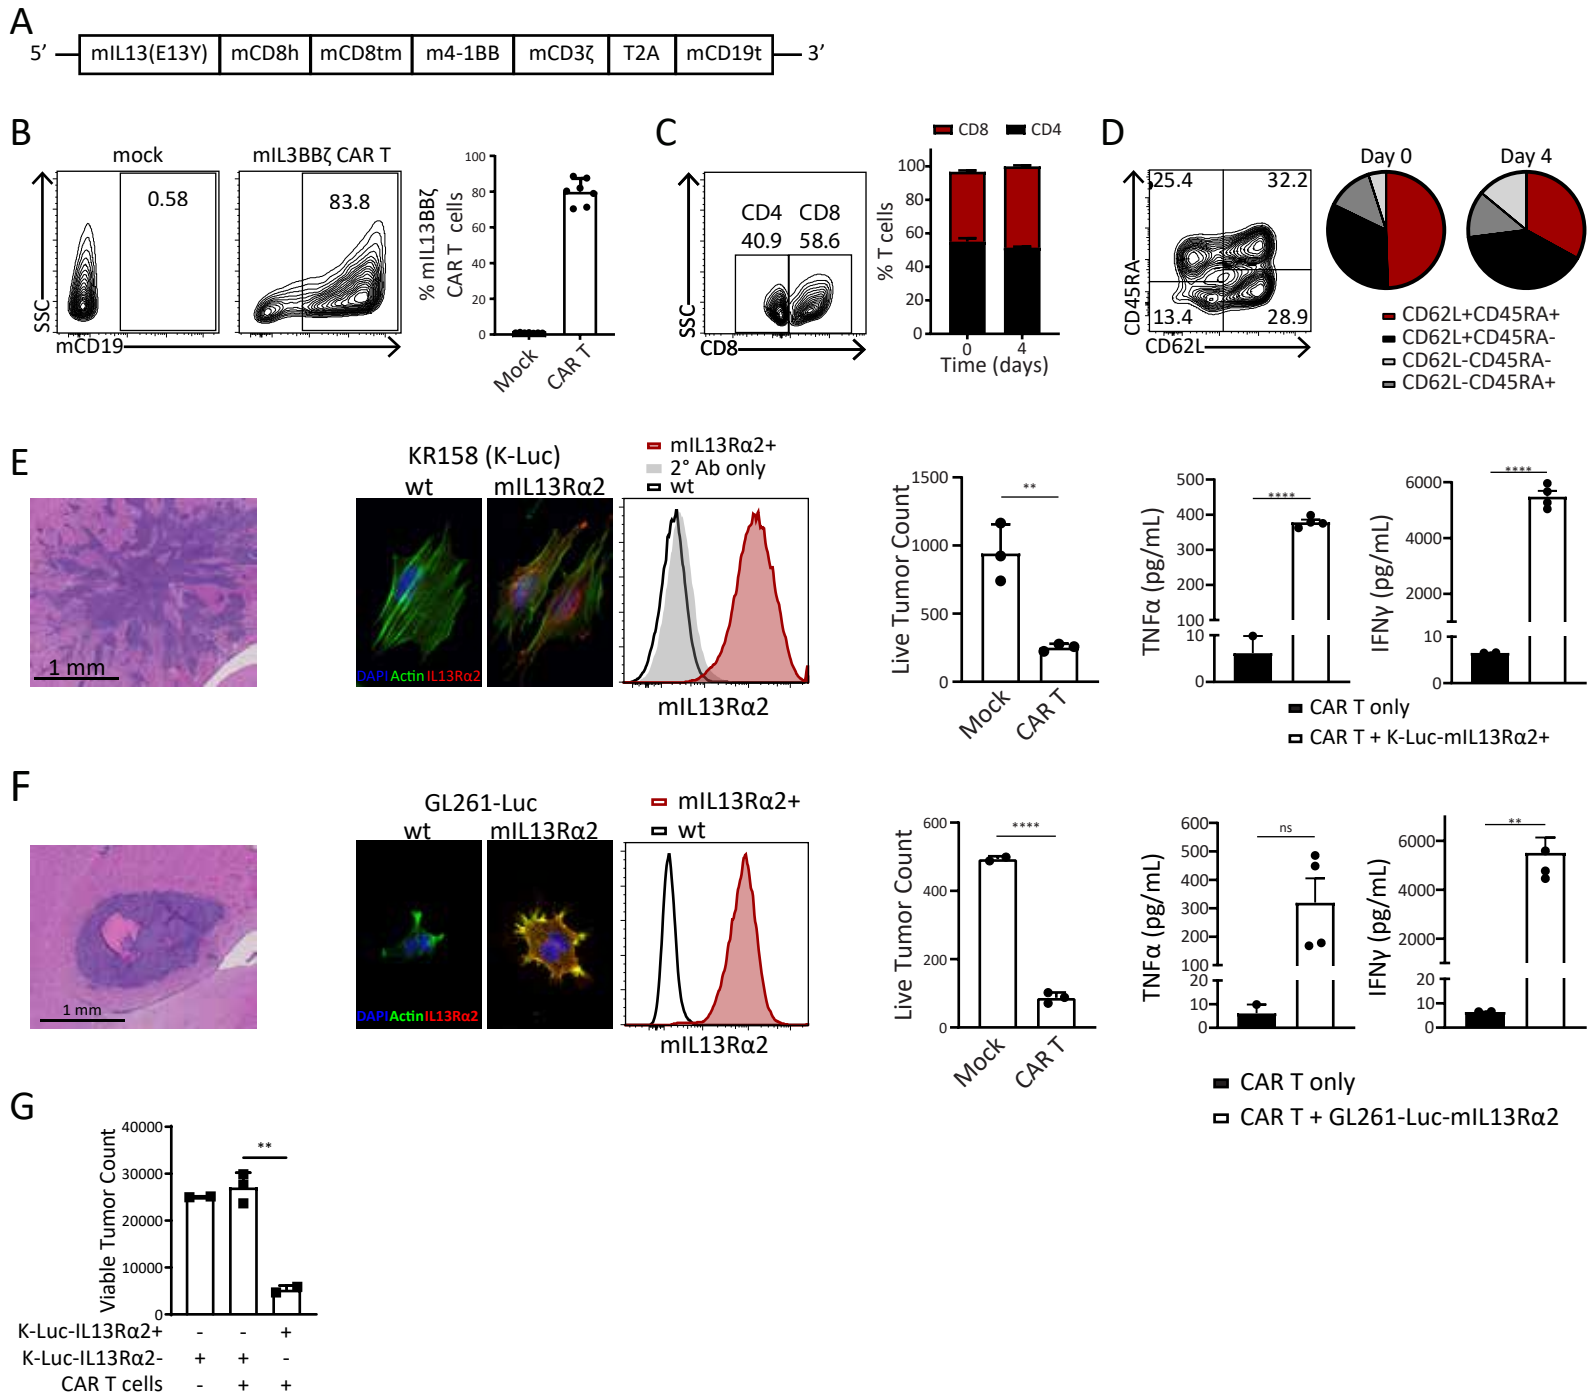

**Supplementary Figure S3. mIL13BBζ generation, phenotypic and functional characterization of mIL13BBζ CAR T cells.** **A**, Schematic of the murine IL13Rα2-CAR T (mIL13BBζ CAR T) construct. **B**, Representative flow cytometry (left panel) and graph summarizing percent CAR+ T cells demonstrating transduction efficiency (right panel). **C** and **D**, Flow cytometry and graph depicting phenotypic changes of murine CAR T cell from day 0 to 4. **E**, Representative image of hematoxylin and eosin (H&E) staining shows morphology KR158 tumors. Immunofluorescent and flow cytometry staining confirms transduction of mIL13Rα2 in KR158 (K-Luc) glioma cells (right panel). In vitro killing of mIL13BBζ CAR T cells against K-Luc cells (E:T, 1:3) (middle panel). Luminex ELISA detects TNFα and IFNγ levels after 24 hour coculture of CAR T cells with tumors (E:T, 1:1) (left panel). **F**, Representative image of hematoxylin and eosin (H&E) staining shows morphology of GL261-Luc tumor and immunofluorescent and flow cytometry staining confirms transduction of mIL13Rα2 in GL261-Luc glioma cells (right panel). In vitro killing capacity of mIL13BBζ CAR T cells against IL13Rα2+ GL261-Luc glioma cells (E:T, 1:3) (middle panel) and Luminex ELISA detects TNFα and IFNγ levels 24 hours after coculture (left panel). **G**, In vitro killing of mIL13BBζ CAR T cells against IL13Rα2+ and IL13Rα2- K-Luc cells. Data are representative of at least two independent experiments. Data are presented as means ± s.e.m. and were analyzed by two-tailed, unpaired Student's t-test. \*p < 0.05, \*\*p < 0.01, \*\*\*p < 0.001 and \*\*\*\*p < 0.0001 for indicated comparison.

# Supplementary Figure S4

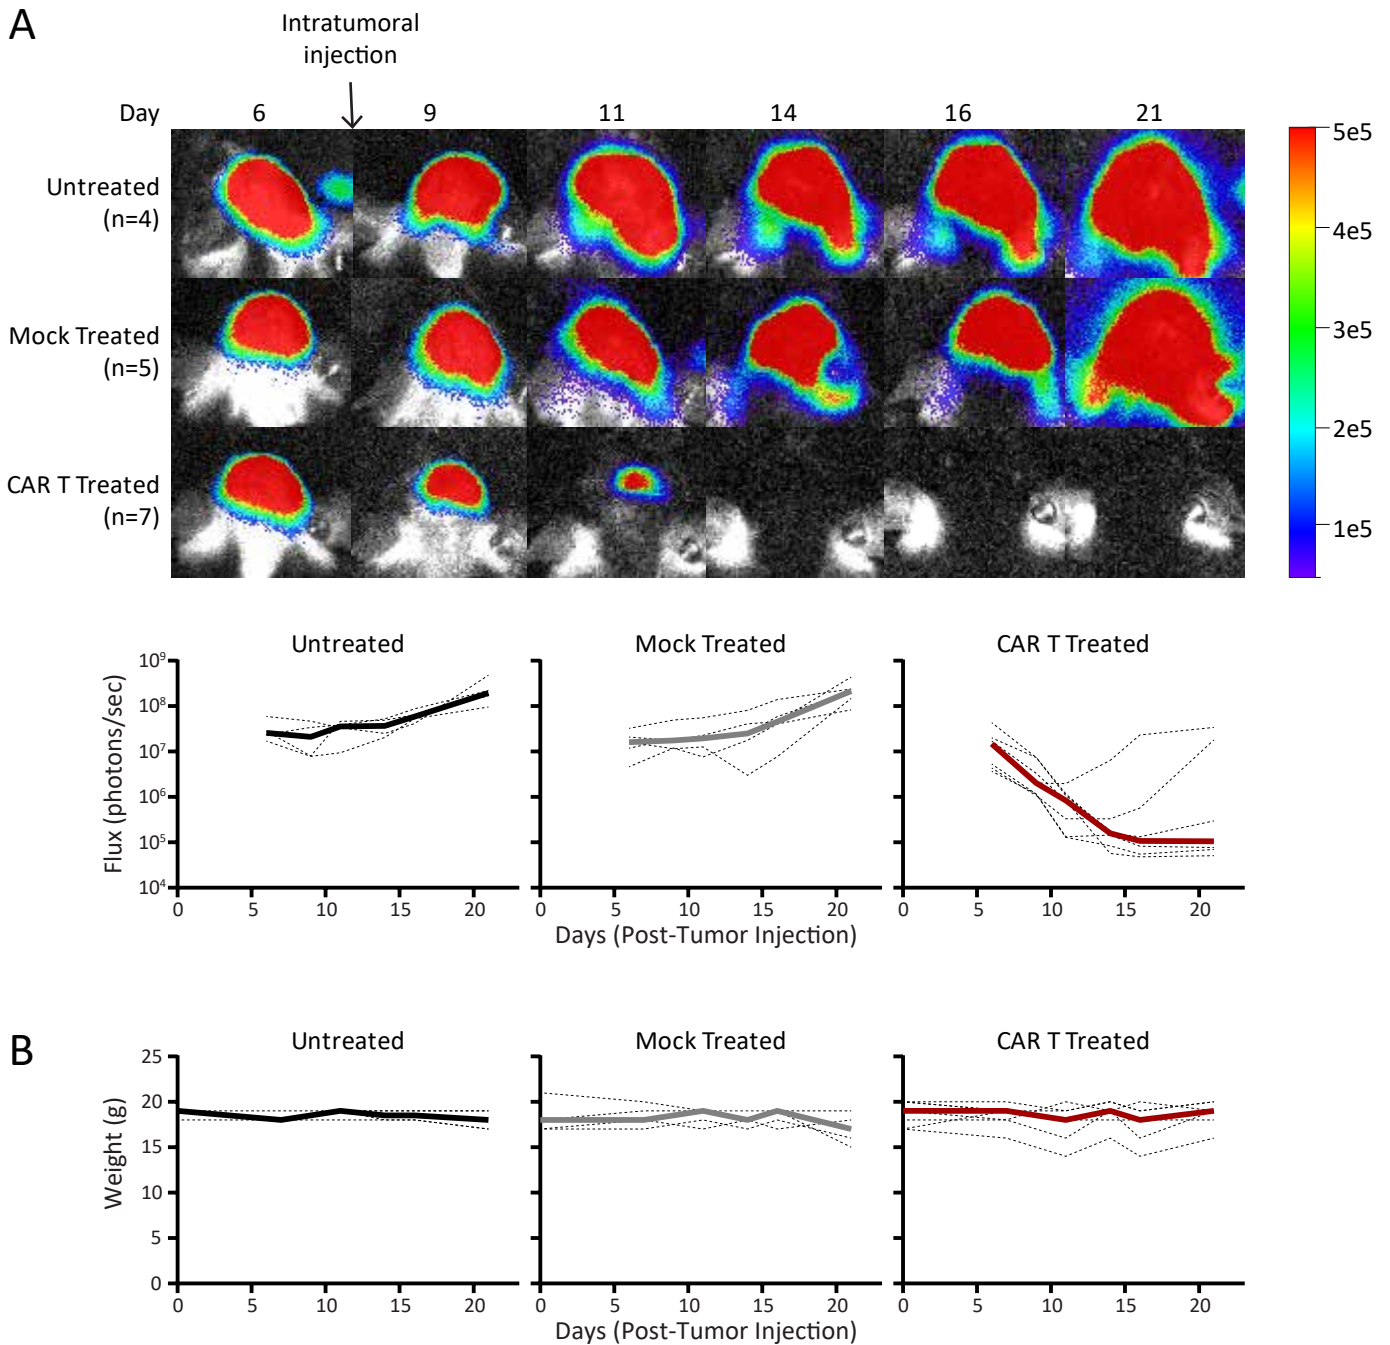

**Supplementary Figure S4. mlL13BB $\zeta$  CAR T cells exhibit potent antitumor activity. A,** Representative bioluminescent (BLI) images (top) and flux values (bottom) show tumor growth in untreated (intratumoral injection of PBS), mock treated (intratumoral injection of untransduced T cells) and CAR T treated (intratumoral injection of transduced mlL13BB $\zeta$  CAR T cells). Individual mice are represented with dotted lines, while median flux is represented by the thick line. **B,** Line graphs show changes in weight in untreated, mock treated and CAR T treated groups. Individual mice are represented with dotted lines, while median weight is represented by the thick line. n=4-7 mice per group.

# Supplementary Figure S5

**A**

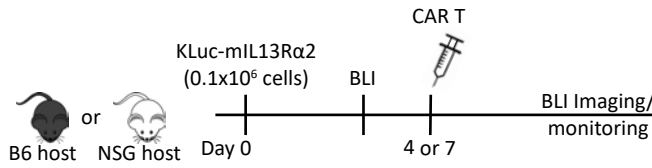

**B**

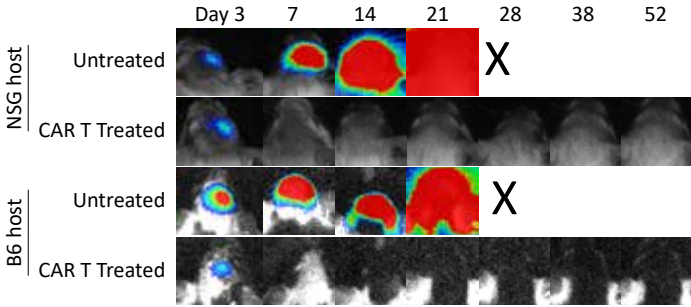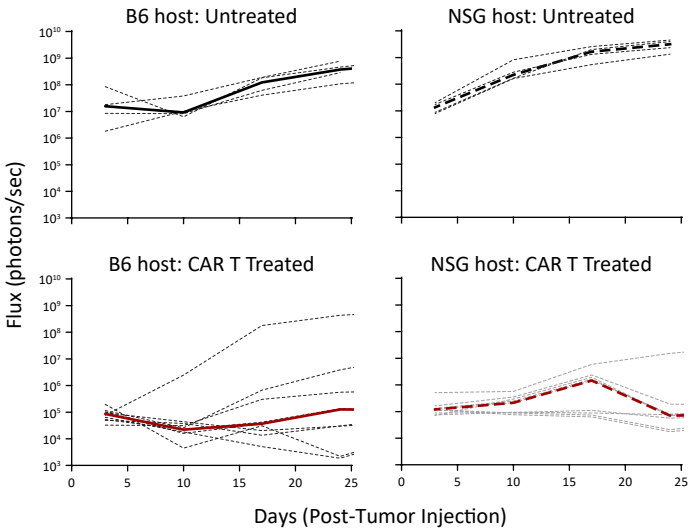

**C**

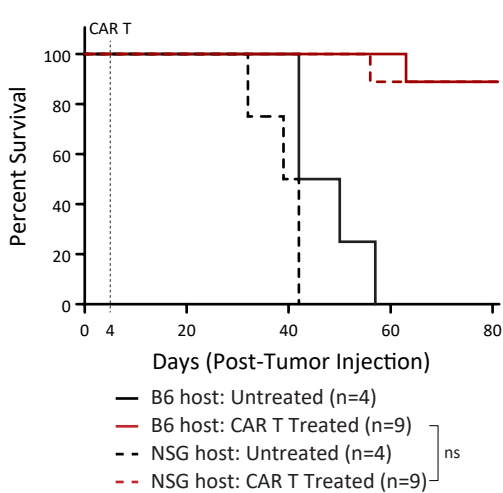

**D**

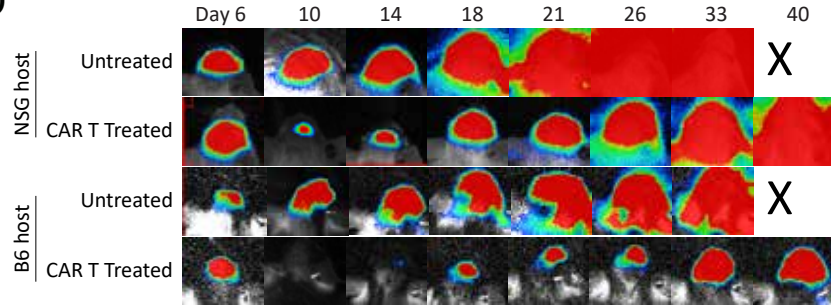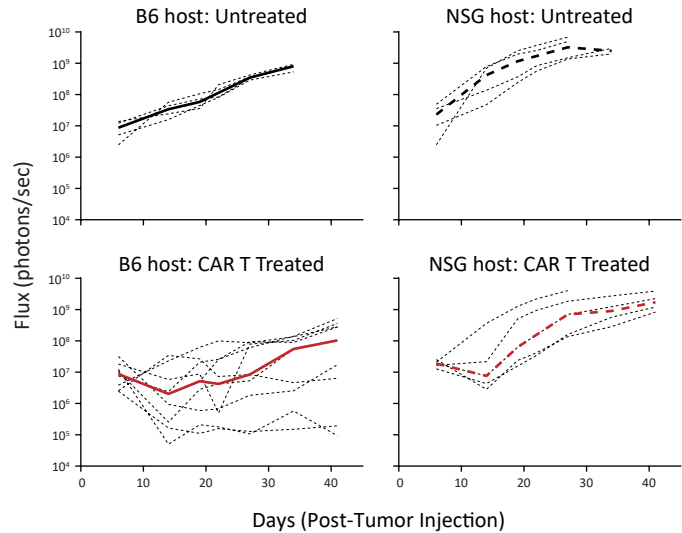

**E**

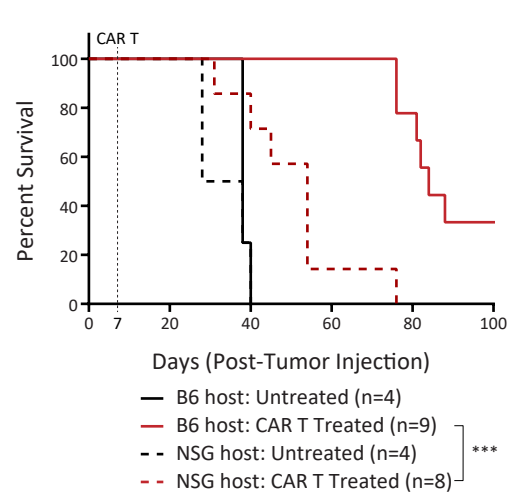

## Supplementary Figure S5. mL13BBζ CAR T cells have superior antitumor activity in immunocompetent host.

**A**, Schema of day 4 and 7 in vivo experimental design. **B**, Representative bioluminescent (BLI) images (top) and flux values (bottom) show tumor growth in untreated and CAR T-treated group in 4-day old tumor model. Individual mice are represented with thin dotted lines, while median flux is represented by the thick line. **C**, Survival curve of mice bearing 4-day old K-Luc-mIL13Rα2<sup>+</sup> tumors in untreated and CAR T treated groups. **D**, Representative bioluminescent (BLI) images (top) and flux values (bottom) show tumor growth in untreated and CAR T-treated group in 7-day old tumor model. Individual mice are represented with thin dotted lines, while median flux is represented by the thick line. **E**, Survival curve of mice bearing 7-day old K-Luc-mIL13Rα2<sup>+</sup> tumors in untreated and CAR T-treated groups. Differences between survival curves (**C** and **E**) were analyzed by log-rank (Mantel-Cox) test.

## Supplementary Figure S6

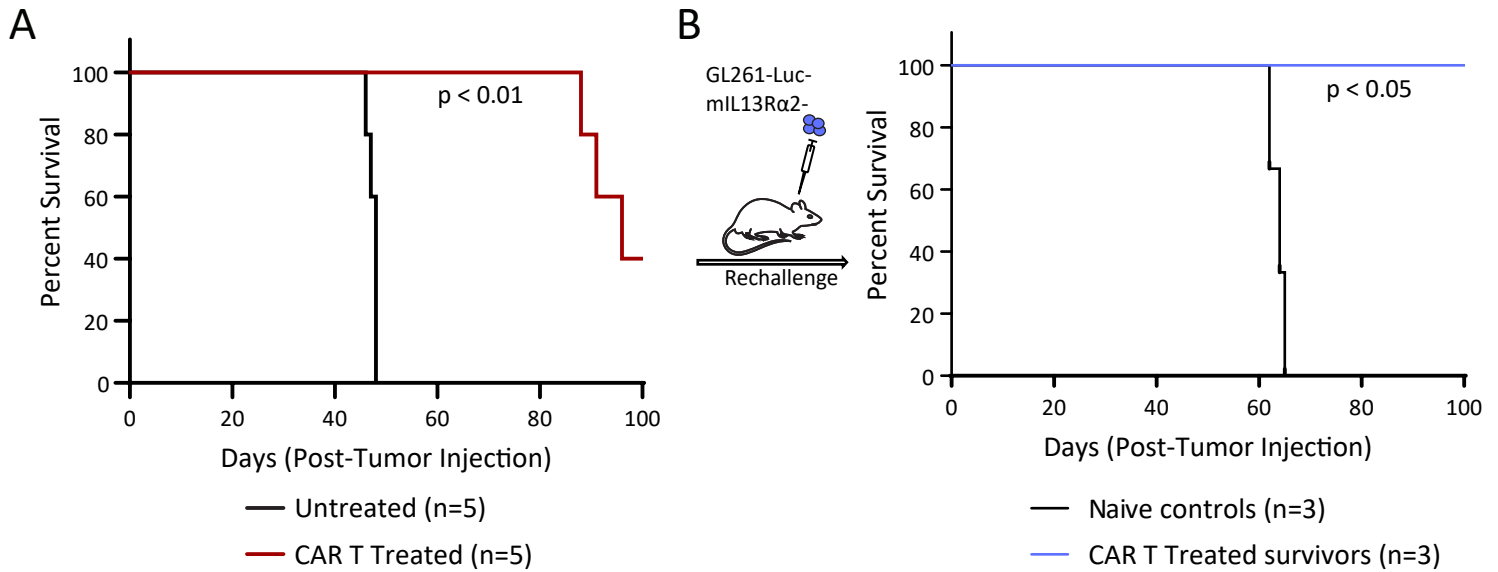

**Supplementary Figure S6. mIL13BB $\zeta$  CAR T cells have potent antitumor activity and induce endogenous memory immune response against GL261-Luc tumors.** **A**, Survival curve of mice bearing mIL13R $\alpha$ 2+ GL261-Luc glioma tumors in untreated and CAR T-treated groups. **B**, Survival of mice cured by the CAR T therapy and rechallenged with IL13R $\alpha$ 2 negative GL261-Luc. Data are representative of at least two independent experiments. \* $p < 0.05$ , \*\* $p < 0.01$ , \*\*\* $p < 0.001$  and \*\*\*\* $p < 0.0001$  for indicated comparison. Differences between survival curves (**A** and **B**) were analyzed by log-rank (Mantel–Cox) test.

# Supplementary Figure S7

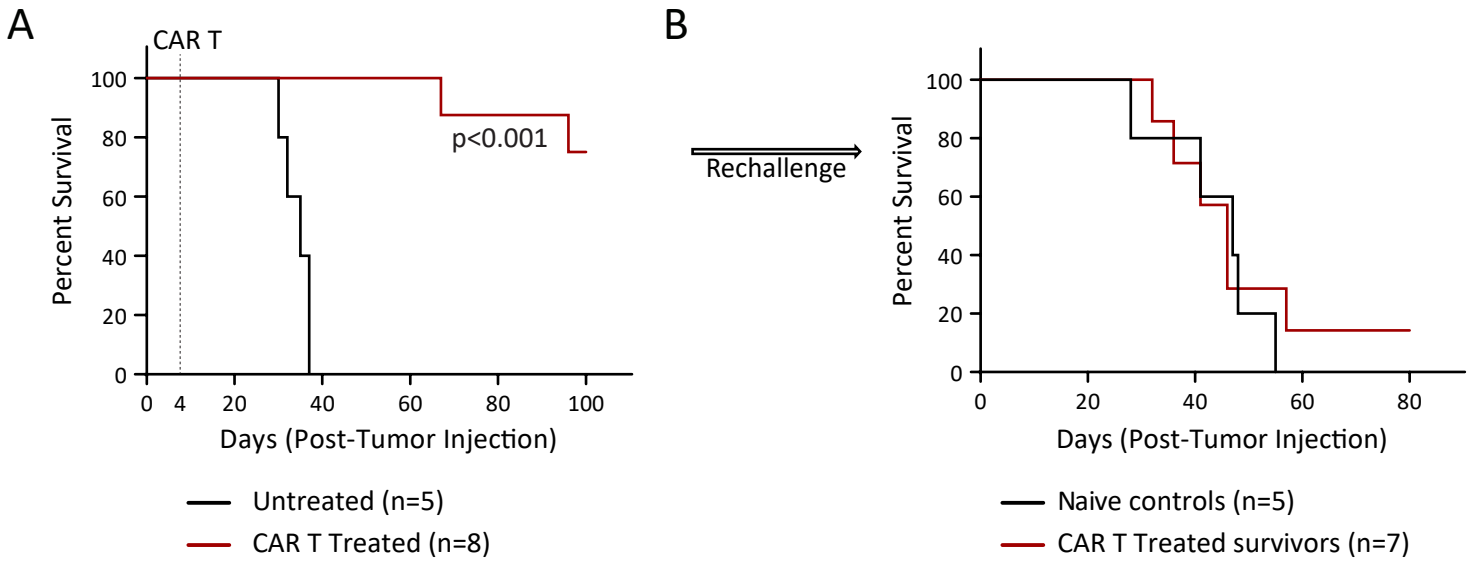

**Supplementary Figure S7. mL13BB $\zeta$  CAR T cells have potent antitumor activity but are unable to induce endogenous memory immune response in a less established TME. A,** Survival curve of mice bearing 4 day-old K-Luc-mL13R $\alpha$ 2+ tumors in untreated and CAR T treated groups. **B,** Survival of mice cured by the CAR T therapy and rechallenged with IL13R $\alpha$ 2 negative K-Luc tumors. Differences between survival curves (**A**) were analyzed by log-rank (Mantel–Cox) test.

## Supplementary Figure S8

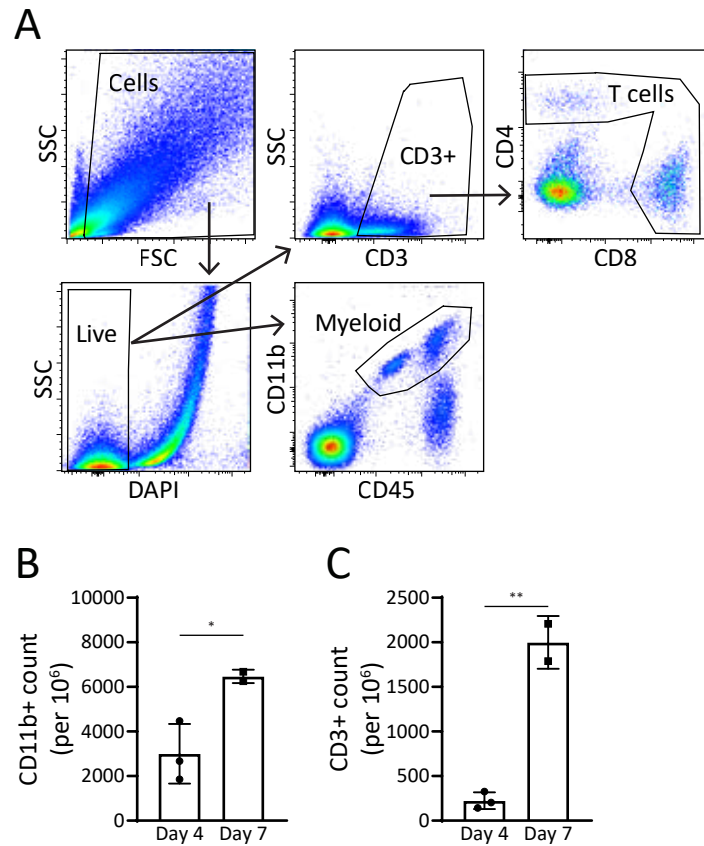

**Supplementary Figure S8. Comparison of tumor immune infiltrates in a 4- and 7-day engrafted K-Luc-mIL13R $\alpha$ 2+ tumor. A,** Representative flow cytometry and gating strategy of lymphoid and myeloid population in the TME. **B,** Quantification of CD11b and **C,** CD3 cells after flow cytometry sort of untreated, K-Luc-mIL13R $\alpha$ 2+ tumor bearing mice. Each symbol represents one individual. Data are presented as means  $\pm$  s.e.m. and were analyzed by two-tailed, unpaired Student's t-test. \* $p < 0.05$ , \*\* $p < 0.01$ , \*\*\* $p < 0.001$  and \*\*\*\* $p < 0.0001$  for indicated comparison.



# Supplementary Figure S9

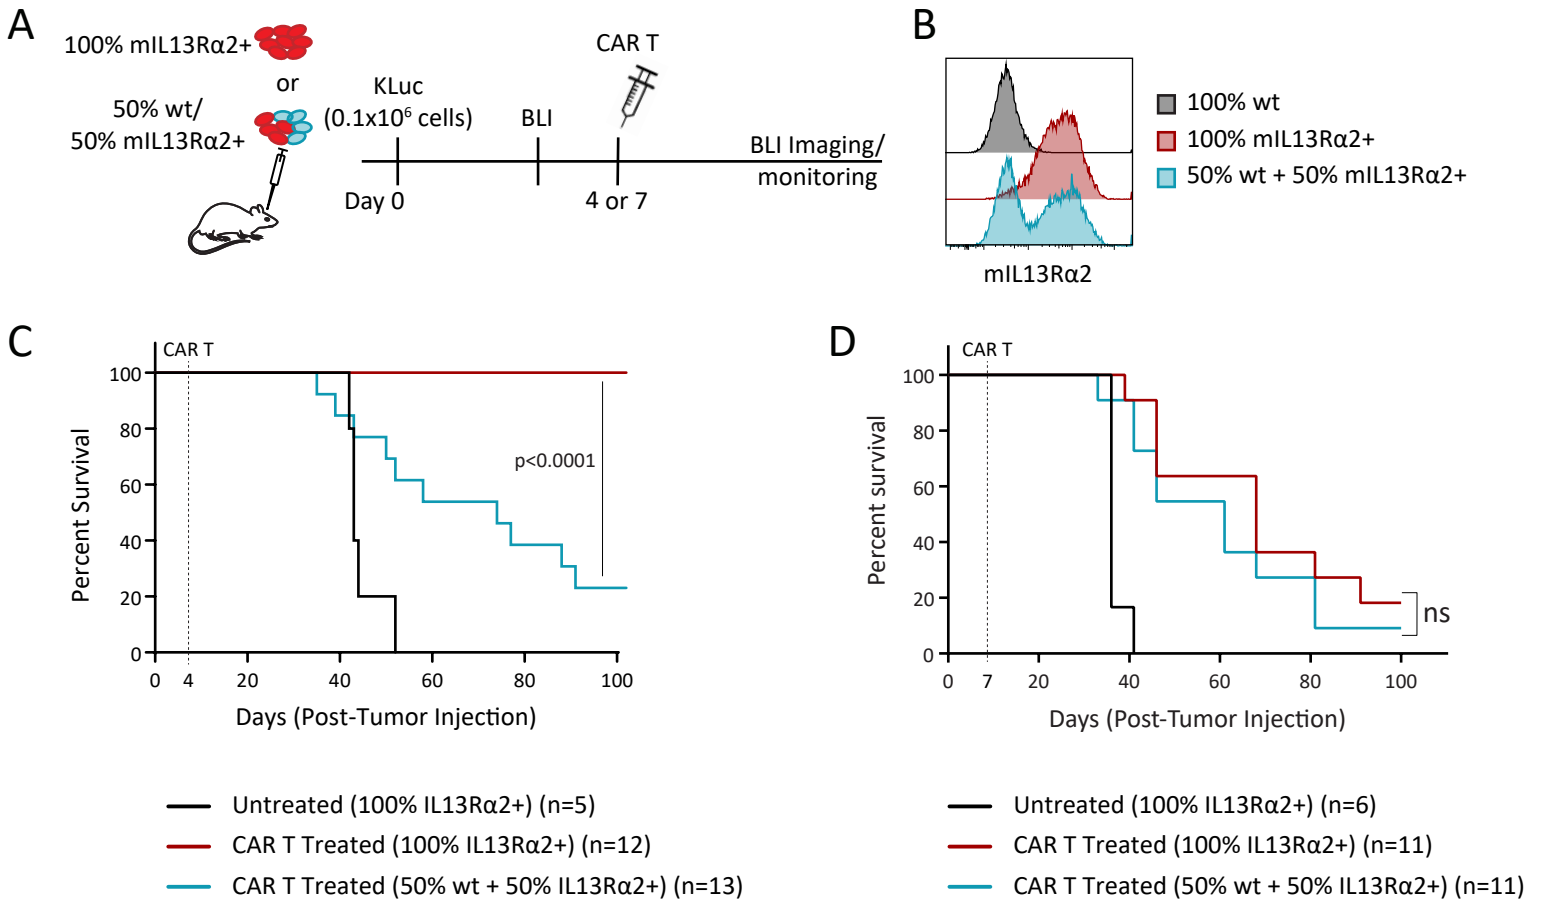

## Supplementary Figure S9. Comparison of survival in mice bearing mixed antigen tumors.

**A**, Schema of day 4 and 7 in vivo experimental design. **B**, Representative flow cytometry showing different levels of mL13Rα2. **C**, Survival curve of mice bearing day 4 K-Luc-mL13Rα2+ tumors in untreated and CAR T treated groups. **D**, Survival curve of mice bearing day 7 K-Luc-mL13Rα2+ tumors in untreated and CAR T treated groups. Differences between survival curves (**C** and **D**) were analyzed by log-rank (Mantel–Cox) test.

Supplementary Figure S10

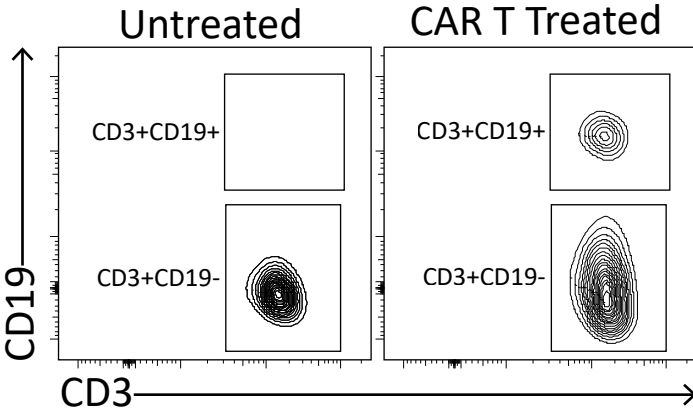

**Supplementary Figure S10. Flow cytometry sort of endogenous and CAR T cells.** A representation of flow cytometry sort of endogenous (CD3+CD19-) and CAR T (CD3+CD19+) populations from K-Luc-mIL13R $\alpha$ 2 bearing mice.

# Supplementary Figure S11

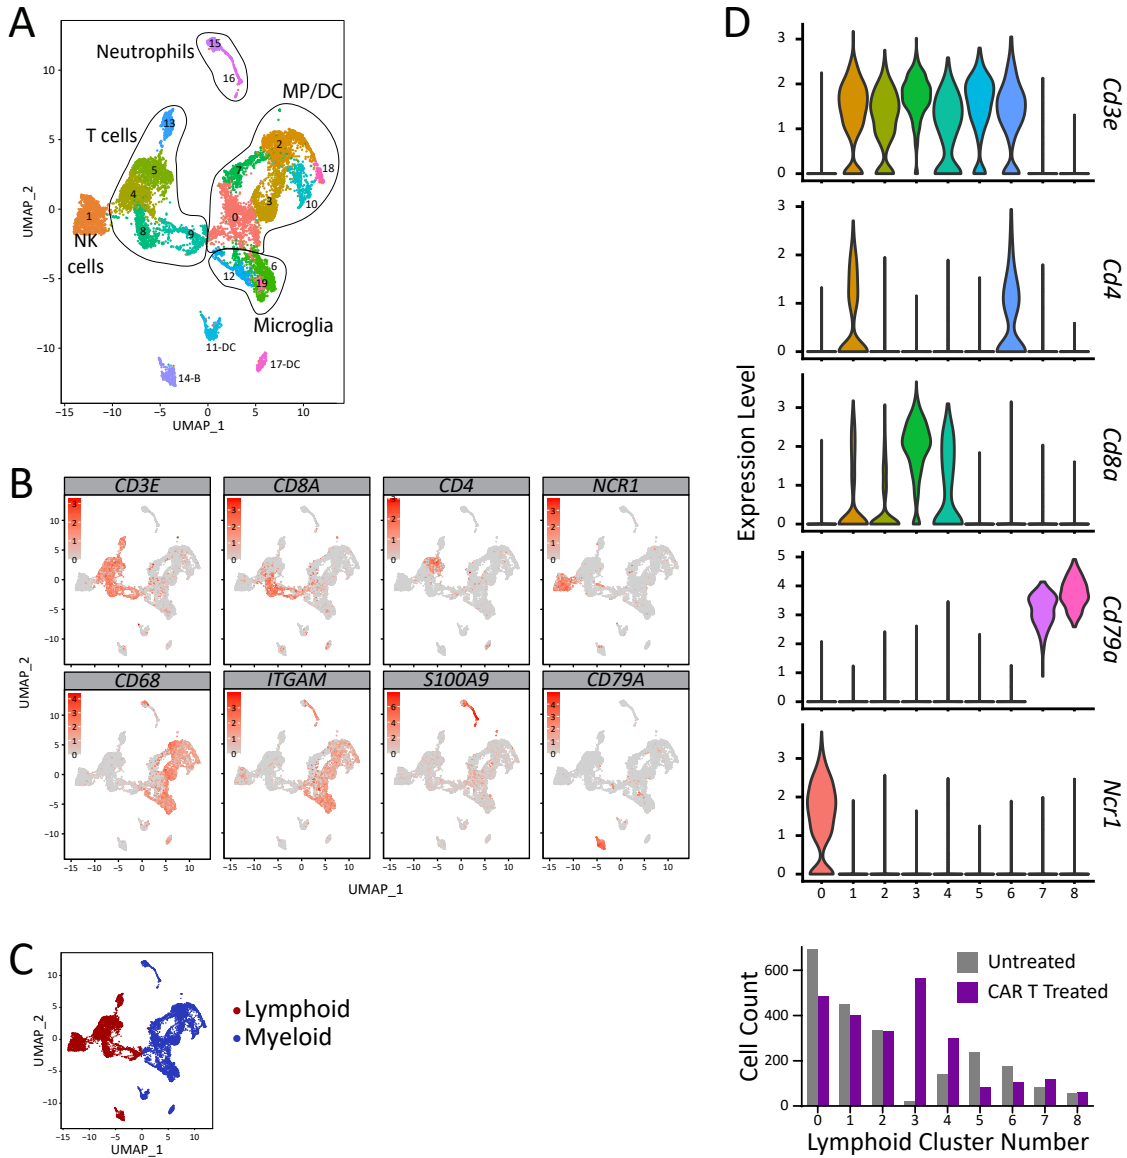

**Supplementary Figure S11. Single cell RNA sequencing of intratumoral lymphoid population.** **A**, UMAP plot from merged untreated and CAR T treated data of exclusively intratumoral immune cells. **B**, Feature plot of immune subset-specific marker-gene expression. **C**, UMAP plot shows intratumoral lymphoid and myeloid compartments. **D**, Violin plots (top) depict lymphoid specific markers and bar graph demonstrates changes in frequency of lymphoid subclusters (bottom).

## Supplementary Figure S12

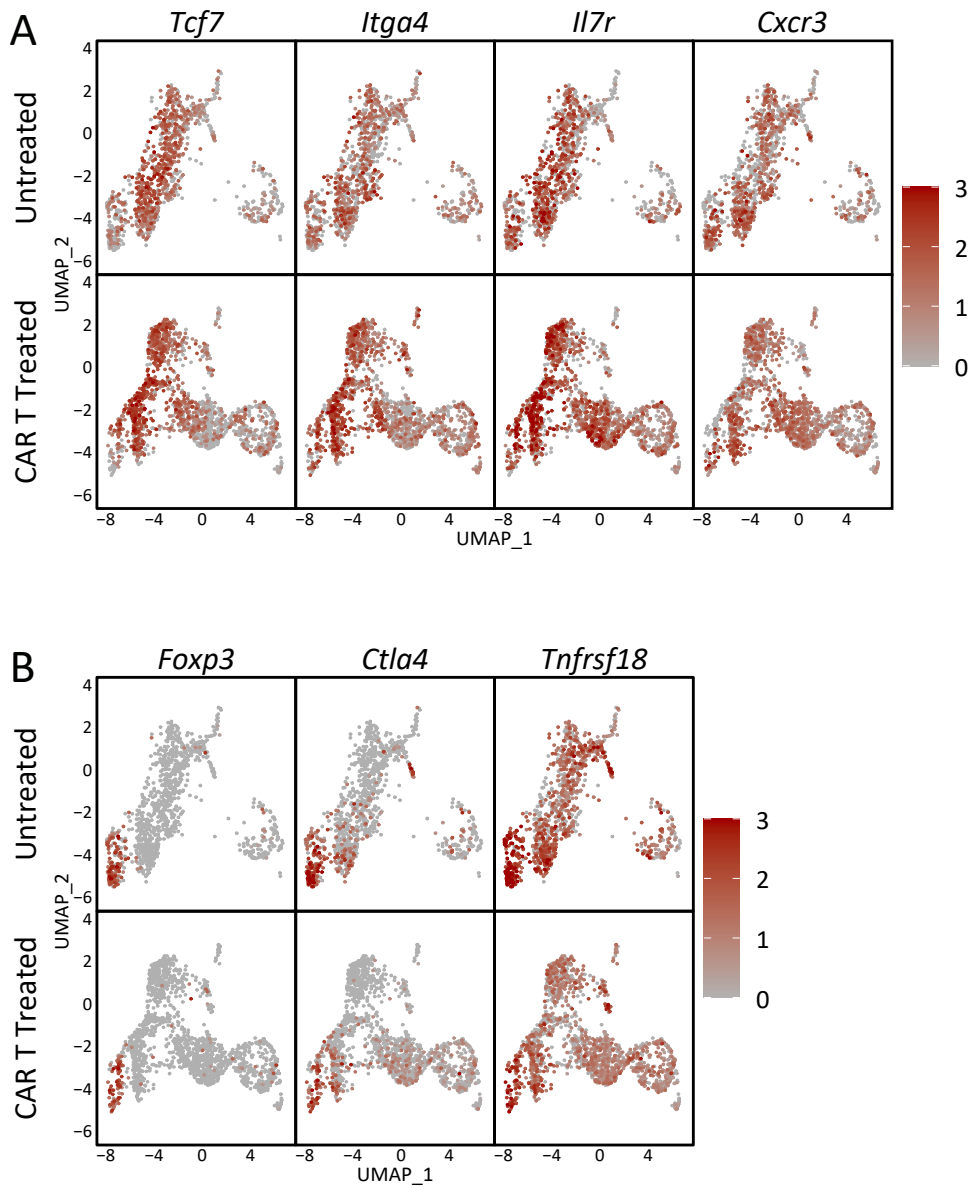

**Supplementary Figure S12. Single-cell RNA sequencing identifies phenotypes of intratumoral T cells. A,** UMAP plots demonstrate enhancement of genes associated with memory stem like T cells after CAR T therapy. **B,** UMAP plots demonstrate reduction in expression of genes associated with T regulatory cells after CAR T therapy.

## Supplementary Figure S13

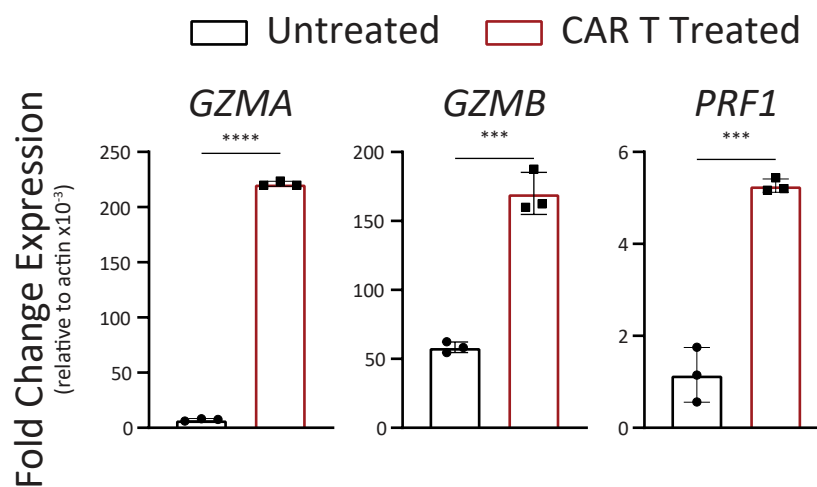

**Supplementary Figure S13. Expression of genes associated with T cell activation in intratumoral T cells.** qPCR analysis shows genes associated with T cell activation. Data are presented as means  $\pm$  s.e.m. and were analyzed by two-tailed, unpaired Student's t-test. \* $p < 0.05$ , \*\* $p < 0.01$ , \*\*\* $p < 0.001$  and \*\*\*\* $p < 0.0001$  for indicated comparison.

# Supplementary Figure S14

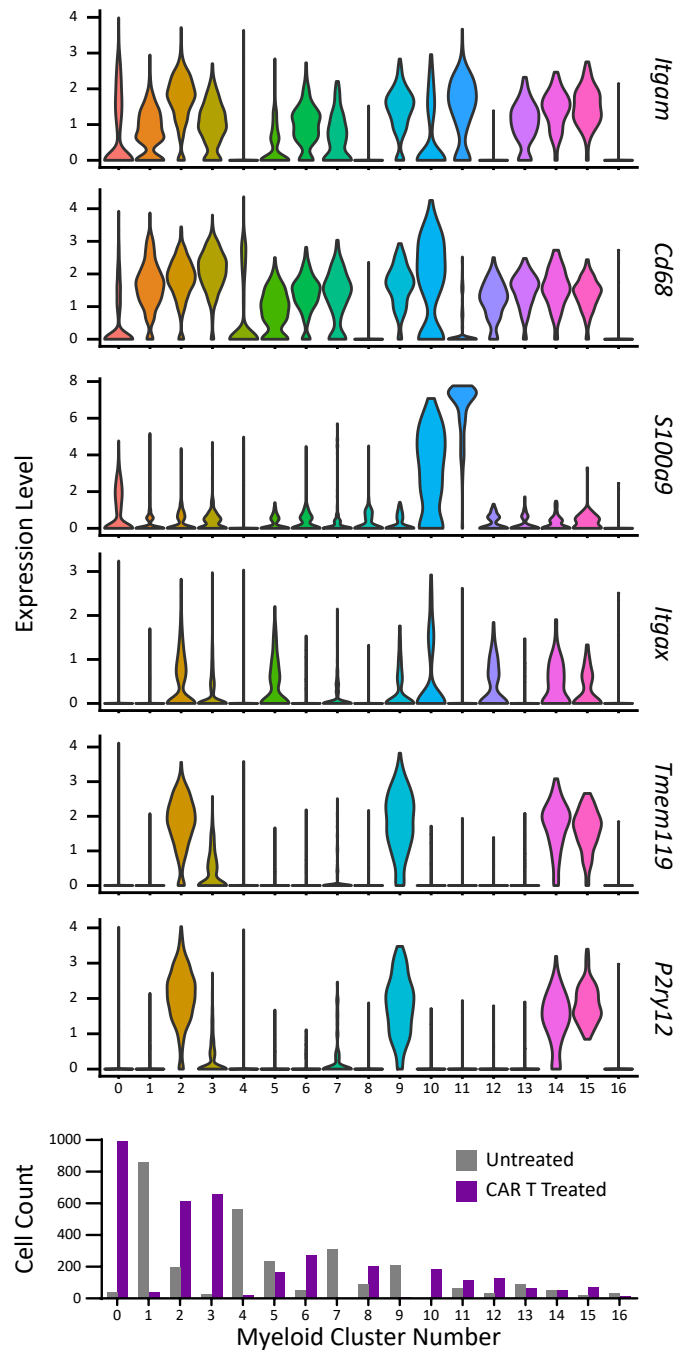

**Supplementary Figure S14. Single cell RNA sequencing of intratumoral myeloid population.** Violin plots (top) depict myeloid specific markers and bar graph demonstrates changes in frequency of myeloid subclusters (bottom).

## Supplementary Figure S15

A

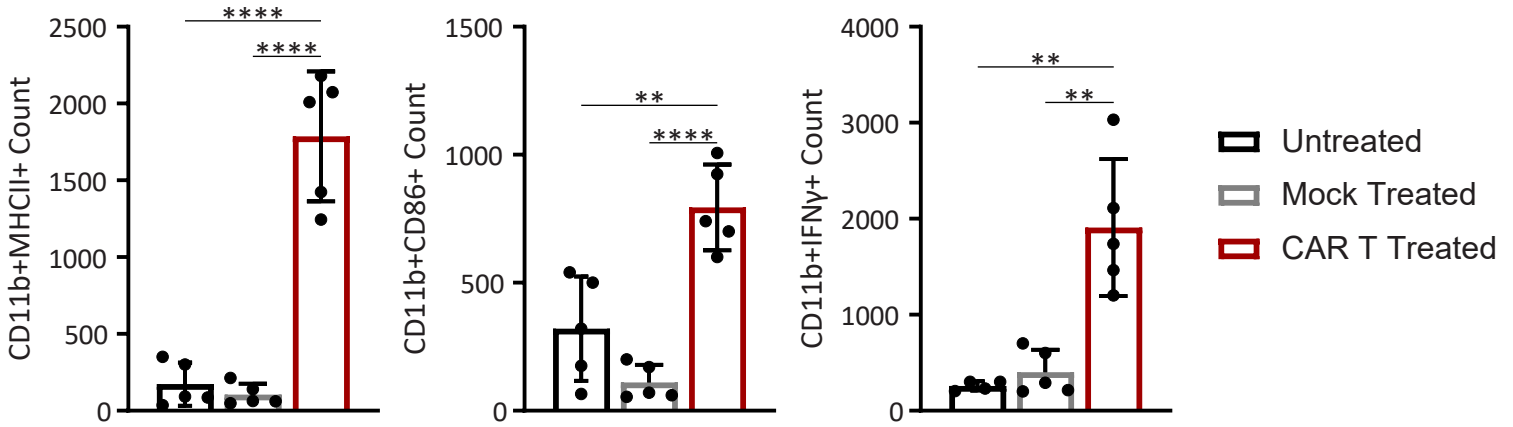

B

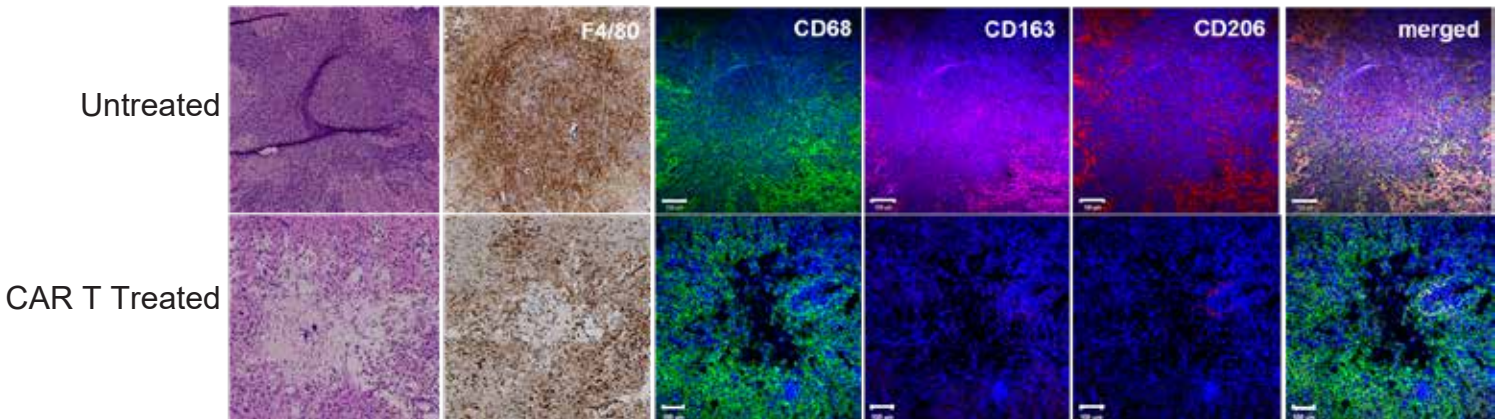

**Supplementary Figure S15. Characterization of intratumoral macrophage after CAR T treatment.** **A**, Bar graphs demonstrate number of M1 macrophages (MHCII+, CD86+ and IFNγ+) in the TME. **B**, Representative image of hematoxylin and eosin (H&E) staining shows morphology of K-Luc tumor, immunohistochemistry of F4/80 and immunofluorescent staining of CD68, CD163 and CD206 of markers on intratumoral macrophages in untreated and CAR T treated K-Luc-mIL13Rα2+ tumor bearing mice. Scale bar is 100 μm.

## Supplementary Figure S16

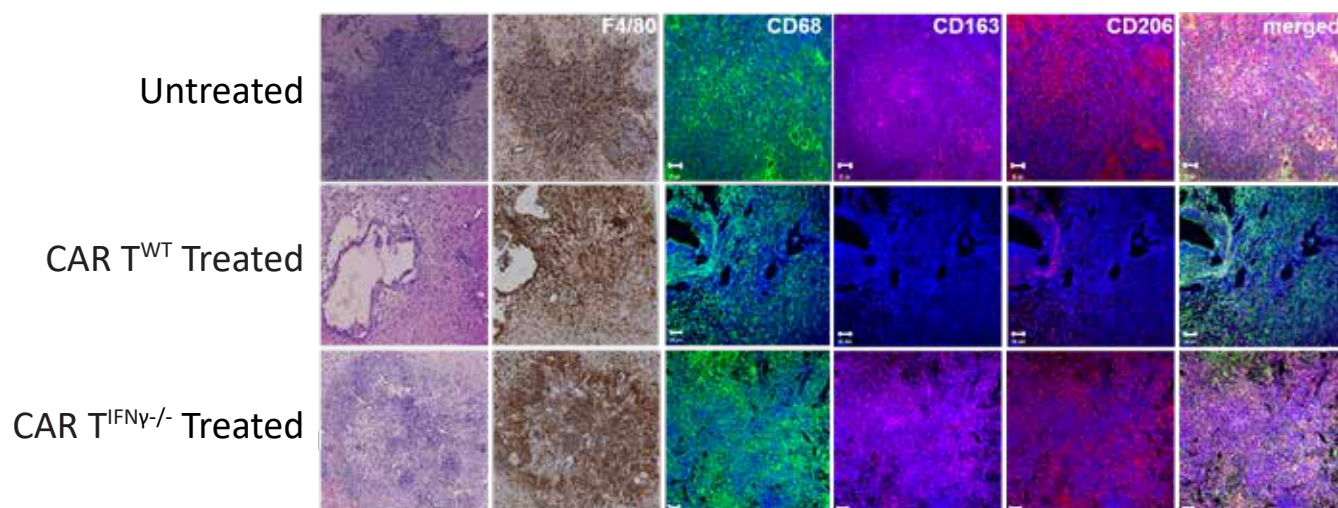

**Supplementary Figure S16. Lack of IFN $\gamma$  production by CAR T cells preserves the M2 type macrophages.** Hematoxylin and eosin (H&E) staining demonstrates tumor site (left), immunohistochemistry of F4/80 and immunofluorescent staining of CD68, CD163 and CD206 markers on intratumoral macrophages in untreated, CAR T treated and CAR T<sup>IFN $\gamma$ -/-</sup> treated K-Luc-mIL13R $\alpha$ 2+ tumor bearing mice. Scale bar is 50  $\mu$ m.



## Supplementary Figure S17

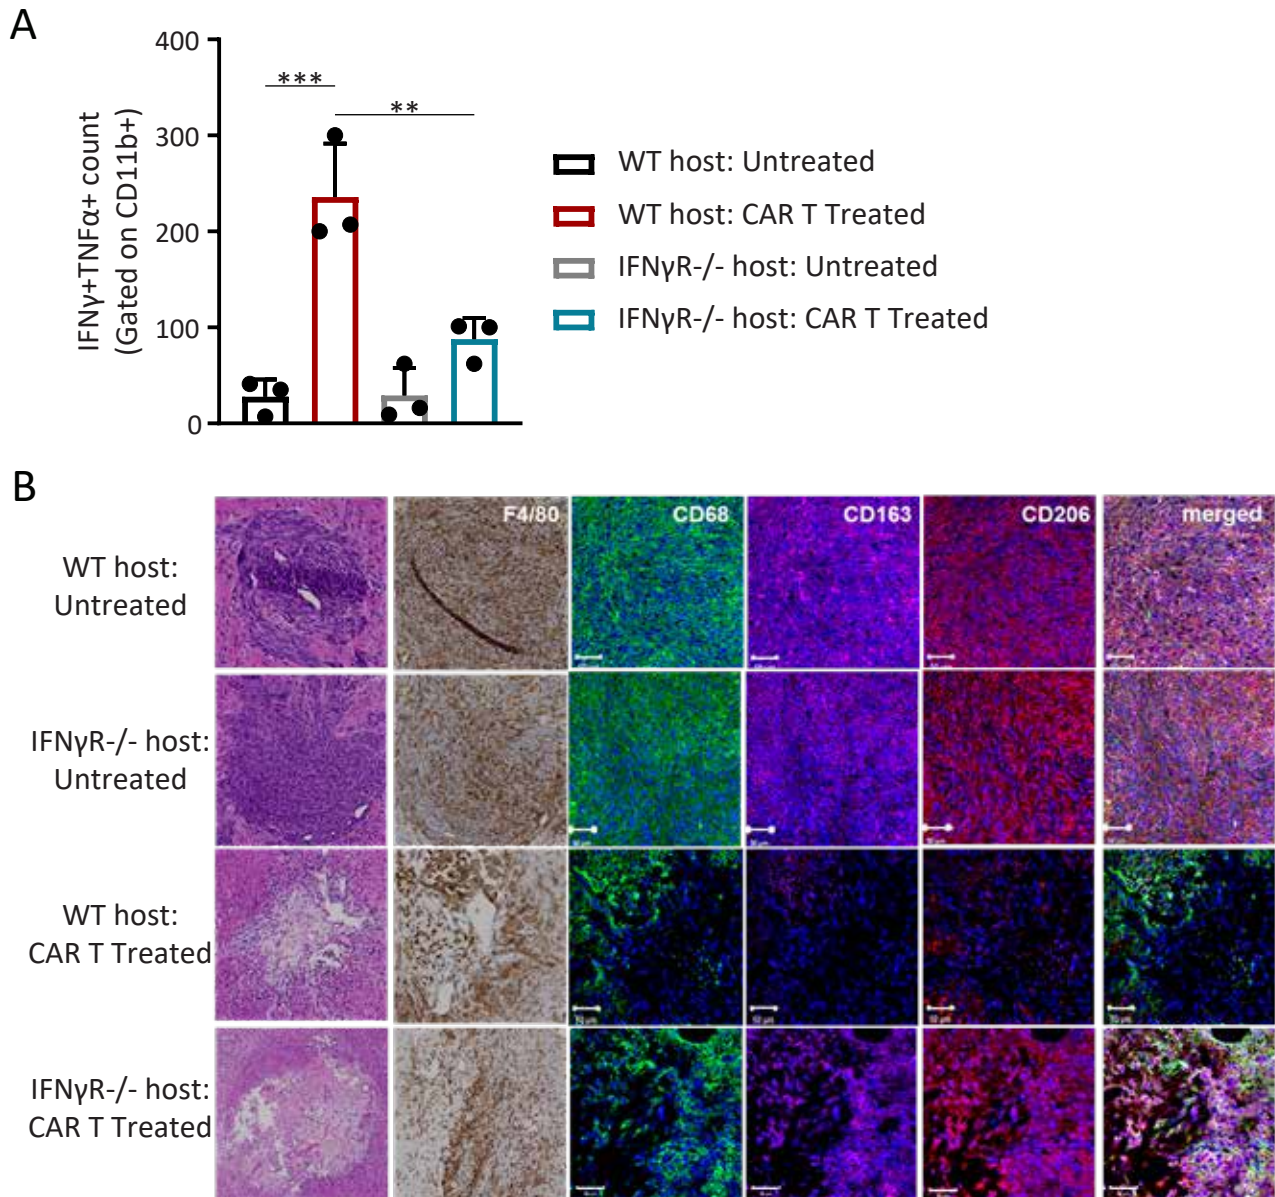

**Supplementary Figure S17. Characterization of intratumoral macrophages after CAR T therapy in IFN $\gamma$ R $^{-/-}$  tumor-bearing host. A,** Bar graph summarizes intratumoral IFN $\gamma$ +TNF $\alpha$ + macrophages (CD11b+CD45+) by flow cytometry. **B,** H&E staining demonstrates tumor site (left), immunohistochemistry of F4/80 and immunofluorescent staining of CD68, CD163 and CD206 markers on intratumoral macrophage in untreated, CAR T treated and CAR T<sup>IFN $\gamma$ R $^{-/-}$</sup>  treated K-Luc-mIL13R $\alpha$ 2+ tumor bearing mice. Scale bar is 50  $\mu$ m.

# Supplementary Figure S18

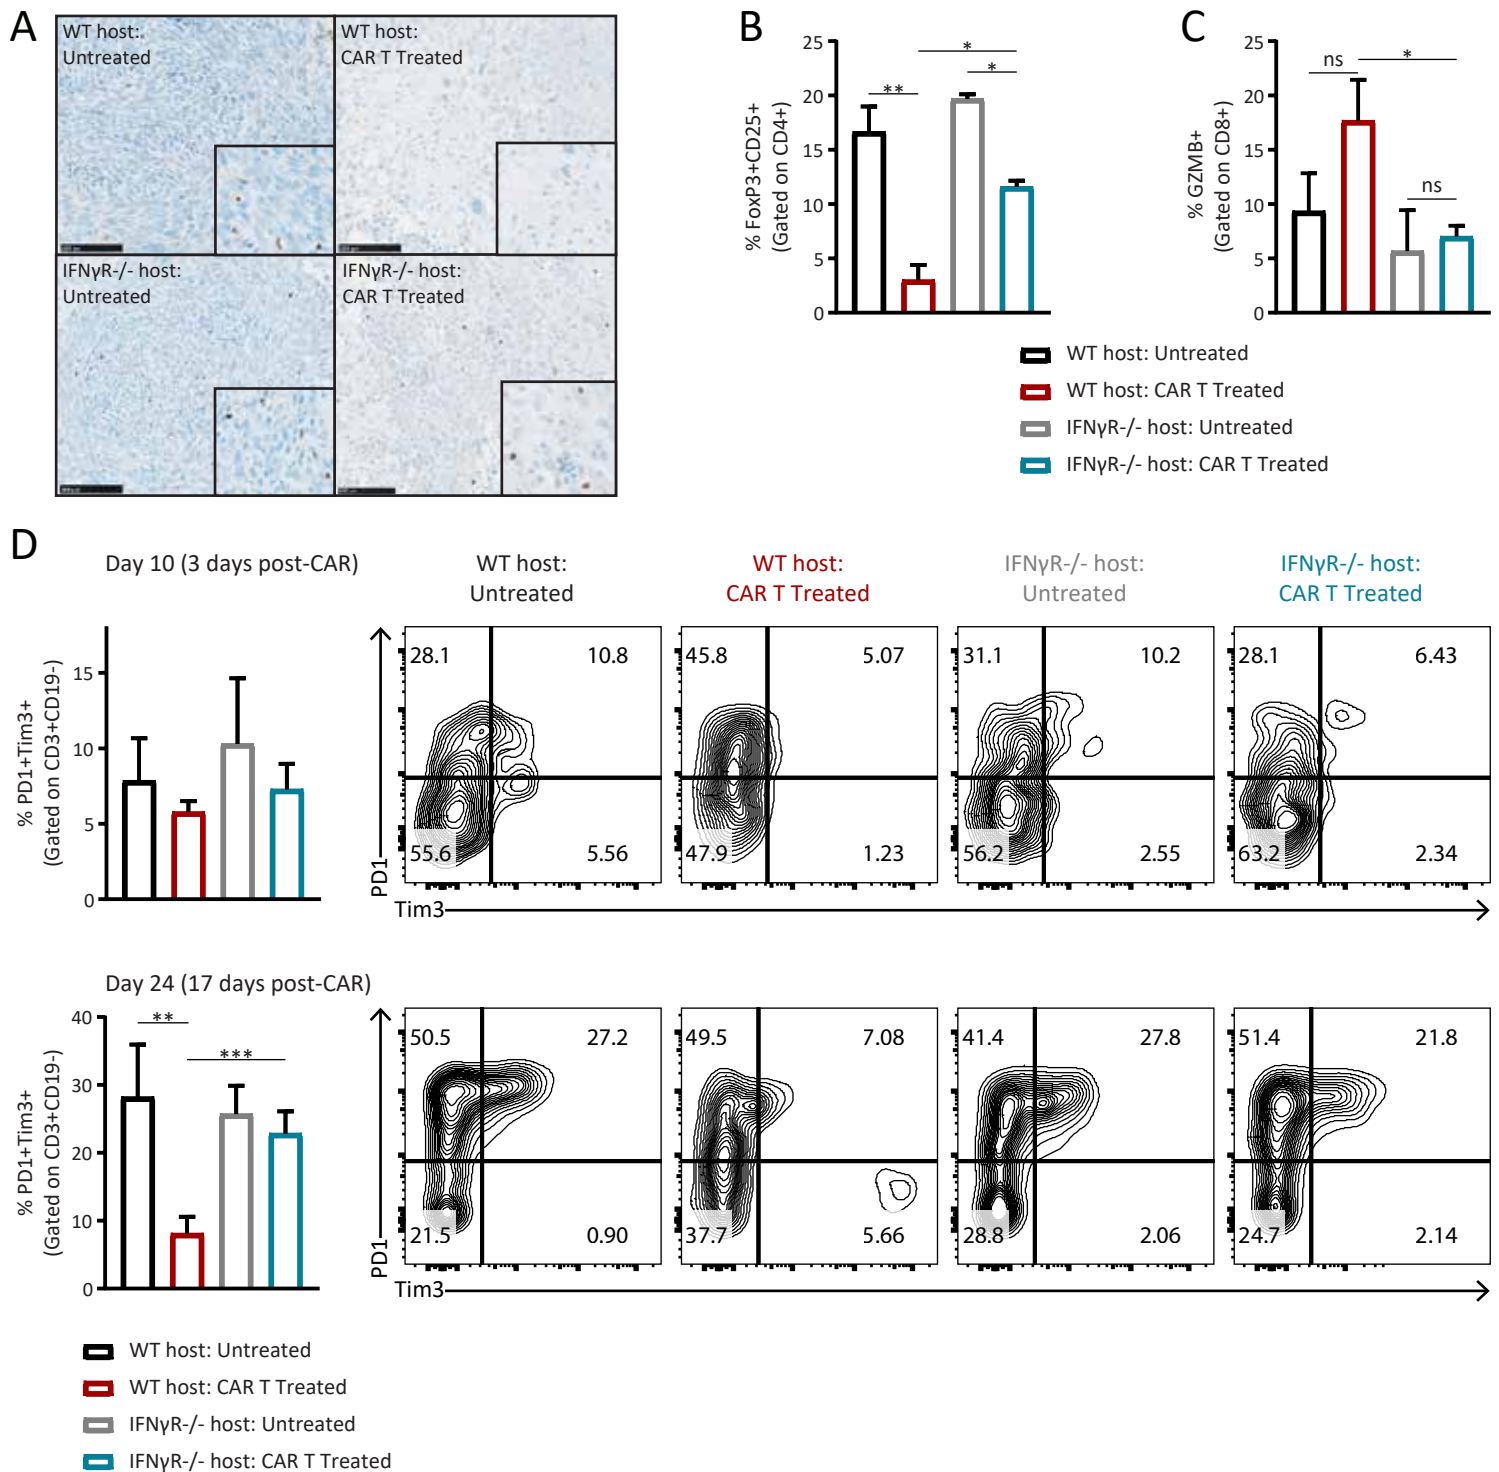

**Supplementary Figure S18. Characterization of different T cell populations in WT and IFN $\gamma$ R<sup>-/-</sup> host after CAR T therapy.** **A**, Immunohistochemistry of FoxP3 marker in TME. Bar graphs show changes in frequency of **B**, regulatory T cells (CD4+CD25+FoxP3+) and **C**, effector T cells (CD8+GZMB+) in the TME by flow cytometry. **D**, Bar graph and representative flow cytometry plots of exhausted T cells at 3 day (top) and 17 day (bottom) after CAR T therapy. Data are presented as means  $\pm$  s.e.m. graphs were analyzed by two-tailed, unpaired Student's t-test. \* $p$  < 0.05, \*\* $p$  < 0.01, \*\*\* $p$  < 0.001 and \*\*\*\* $p$  < 0.0001 for indicated comparison.

# Supplementary Figure S19

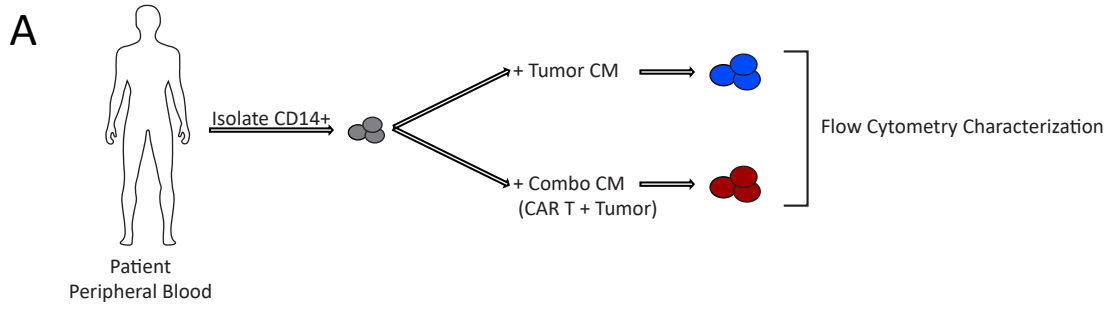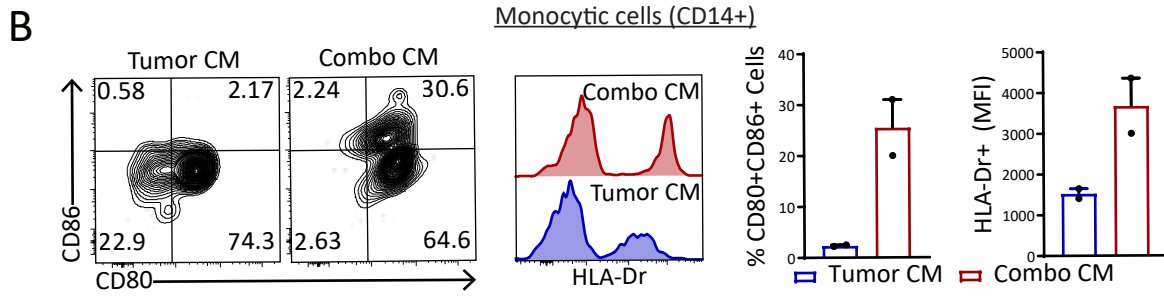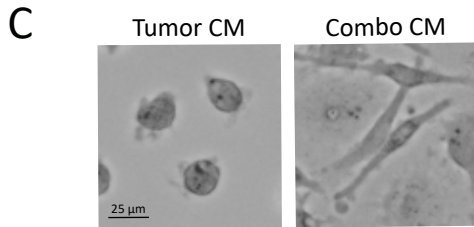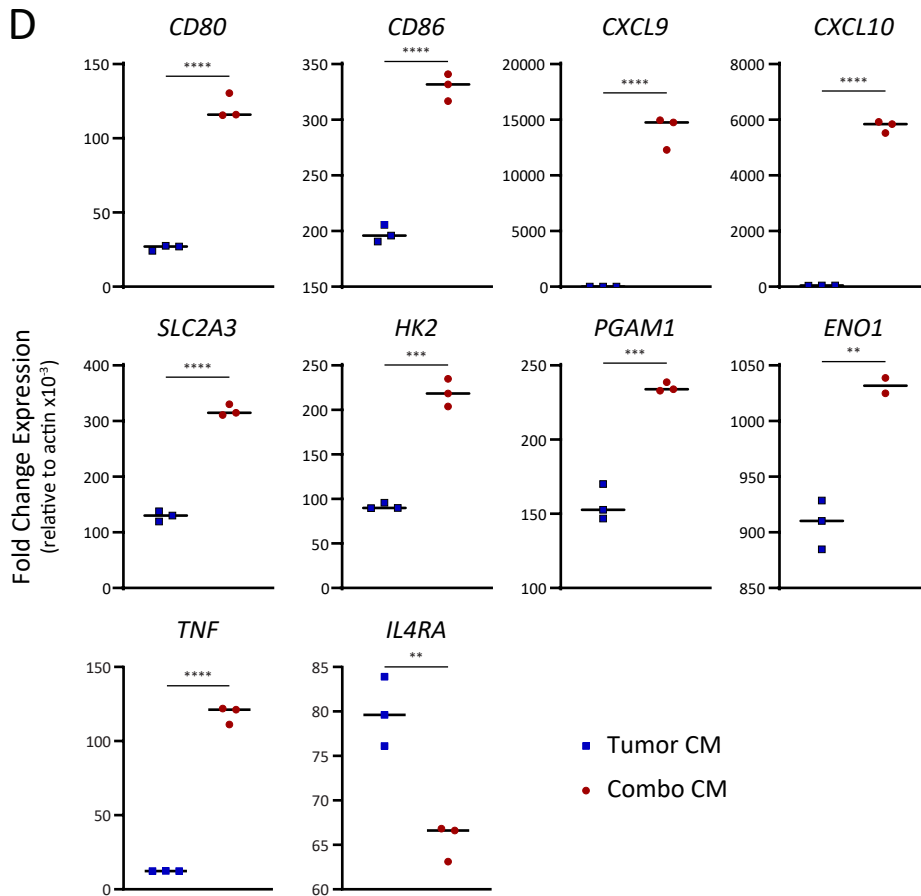

**Supplementary Figure S19. CAR T cells promote monocyte differentiation and generation of M1 type macrophages.** **A**, Schema of experimental design. **B**, Representative flow cytometry (left) and bar graphs (right) depict phenotypic changes in monocytes after incubation with conditioned media (CM) collected from tumor only (Tumor CM) or tumor-activated CAR T cells (Combo CM). **C**, Microscopy images demonstrate morphological change in monocytes after incubation with different conditioned media. **D**, qPCR analysis of genes associated with M1 macrophage phenotype. Data are presented as means  $\pm$  s.e.m. and was analyzed by two-tailed, unpaired Student's t-test. \* $p < 0.05$ , \*\* $p < 0.01$ , \*\*\* $p < 0.001$  and \*\*\*\* $p < 0.0001$  for indicated comparison.
